# Supplementary material for: Five-year Pan-European, longitudinal surveillance of Clostridium difficile ribotype prevalence and antimicrobial resistance: the extended ClosER study
Source: Springer Nature journal article supplement (doi:10.1007/s10096-019-03708-7), 2019-12-07

1 SUPPLEMENTARY INFORMATION

2 **Article title:** Five-year pan-European, longitudinal surveillance of *Clostridium difficile*  
3 ribotype prevalence and antimicrobial resistance: the extended ClosER study

4 **Target journal:** *European Journal Clinical Microbiology & Infectious Diseases*

5 **Authors:** Jane Freeman<sup>1,2</sup>, Jonathan Vernon<sup>2</sup>, Sally Pilling<sup>2</sup>, Kirsti Morris<sup>1</sup>, Scott Nicolson<sup>2</sup>,  
6 Sharie Shearman<sup>2</sup>, Emma Clark<sup>2</sup>, Jose Alejandro Palacios-Fabrega<sup>3</sup>, Mark Wilcox<sup>1,2</sup> and the  
7 Pan-European Longitudinal Surveillance of Antibiotic Resistance among Prevalent  
8 *Clostridium difficile* Ribotypes' Study Group

9 **\*Corresponding author:**

10 Dr Jane Freeman  
11 Department of Microbiology  
12 Old Medical School  
13 Leeds General Infirmary  
14 Leeds  
15 LS1 3EX  
16 West Yorkshire  
17 UK  
18 Telephone: 0113 3928663  
19 Email: jane.freeman4@nhs.net

20

## 21 Online Resource 1

## 22 Supplementary Methods

### 23 Culture and toxin testing

24 Alcohol-shocked faecal specimens or *C. difficile* isolates were inoculated on to cycloserine-  
25 cefoxitin-egg-yolk agar (LabM, Heywood, Lancashire, UK) with lysozyme and cultured  
26 anaerobically for 48 h at 37°C. Forty-eight hour anaerobic brain-heart infusion broth culture  
27 supernatants of each test isolate were added to a Vero cell culture cytotoxicity assay with  
28 *Clostridium sordellii* antitoxin (ProLab Diagnostics, Bromborough, UK) neutralisation

### 29 PCR ribotyping

30 PCR ribotyping using capillary electrophoresis was performed on each isolate by the *C.*  
31 *difficile* Ribotyping Network (CDRN) Reference Laboratory at Leeds Teaching Hospitals  
32 Trust, Leeds, UK, according to the method of Stubbs *et al.* [12, 23]. Ribotypes (RTs) were  
33 assigned against the UK *C. difficile* reference library at Leeds

### 34 Susceptibility testing

35 Minimum inhibitory concentrations (MICs) of metronidazole, vancomycin, rifampicin,  
36 chloramphenicol (Sigma, St Louis, MO, USA); moxifloxacin (Bayer, Leverkusen, Germany),  
37 clindamycin, tigecycline (Pfizer, New York, NY, USA), imipenem (MSD, Hoddesdon, UK),  
38 and fidaxomicin (Astellas, Tokyo, Japan) were determined for each isolate using a Clinical  
39 and Laboratory Standards Institute (CLSI) agar incorporation method with Wilkins–Chalgren  
40 agar, as previously described [1, 4, 9]. Susceptibility breakpoints were defined according to  
41 CLSI or European Committee on Antimicrobial Susceptibility Testing (EUCAST)  
42 recommendations. Fidaxomicin breakpoints were defined according to the manufacturer's  
43 stated epidemiological cut-off (ECOFF) value [7].

### 44 Ribotype diversity scores

45 RT diversity scores for each country were calculated by dividing the total number of RTs  
46 detected, irrespective of prevalence, in that country by the number of isolates tested for that  
47 country. Numbers closest to 1 indicate the highest RT diversity and those closest to 0  
48 correspond to the lowest RT diversity.

## 49 Antimicrobial susceptibility scores by country

50 For each isolate, MICs were designated susceptible (S), intermediately resistant (I) or fully  
51 resistant (R). Each result was assigned a score and a cumulative resistance score (CRS) for  
52 all of the nine antimicrobials tested was then generated for each isolate. An isolate that was  
53 fully susceptible to 4, intermediately resistant to 2, and resistant to 3 antimicrobials would  
54 therefore generate a score of 8 (0+0+0+0+1+1+2+2+2). Isolates were grouped by country  
55 and a mean CRS was generated for each country.

## 56 Statistical analyses

57 The relationship between RT diversity and mean CRS scores was analysed using the  
58 Pearson correlation coefficient (Fisher's Normal Transformation) in Excel Analyse-IT.  
59 Fidaxomicin MICs were compared using one-way analysis of variance for independent  
60 samples with Tukey's Honest Significant Difference test, at <http://www.vassarstats.net/>.

61 Online Resource 2

62 Percentage prevalence of the most common *C. difficile* PCR ribotypes for countries with  
 63 submissions in all five years of the *ClosER* study

64

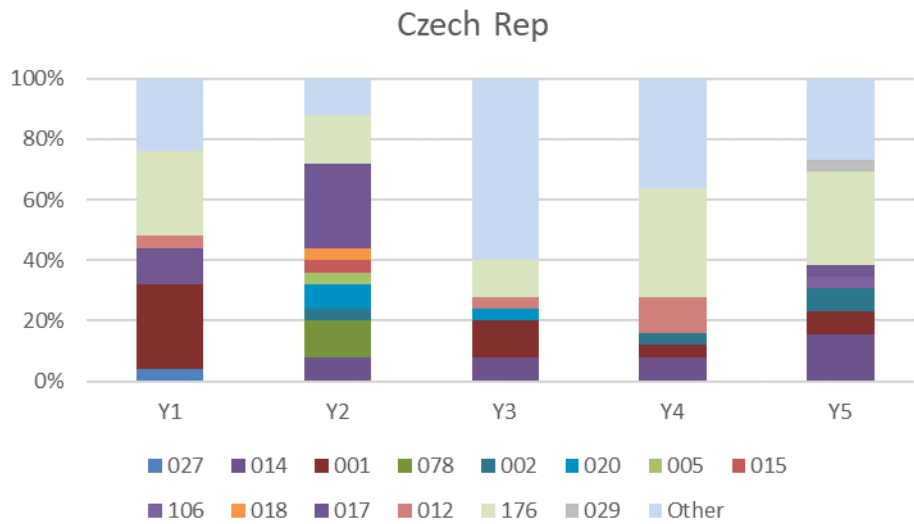

65

66

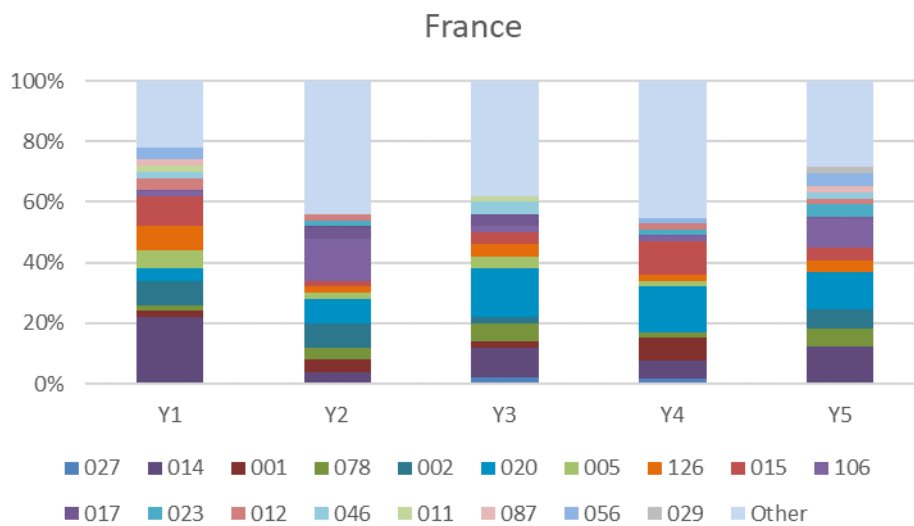

67

68

### Germany

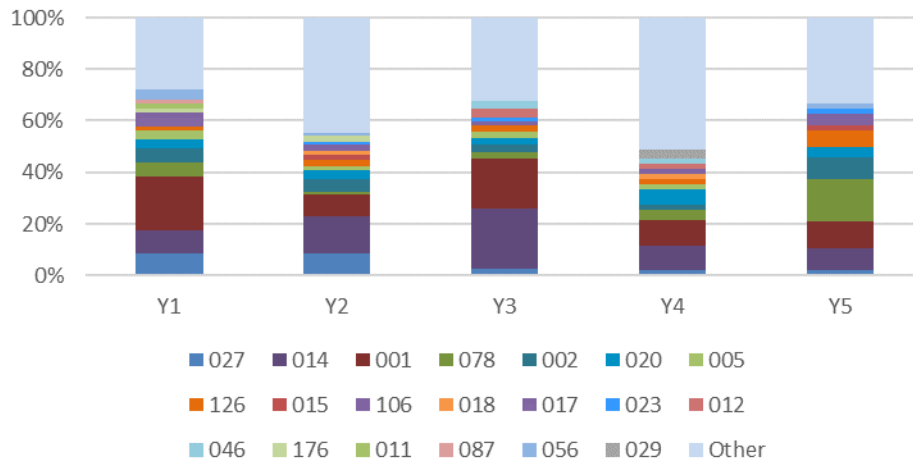

69

70

### Ireland

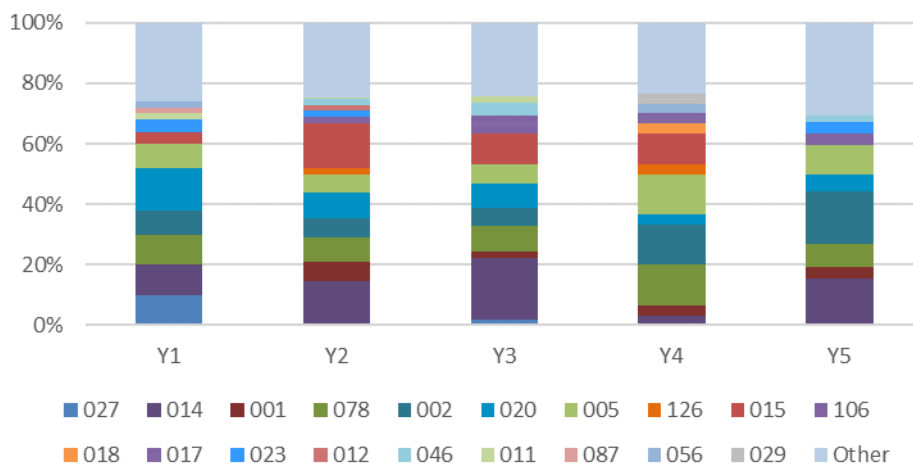

71

72

### Spain

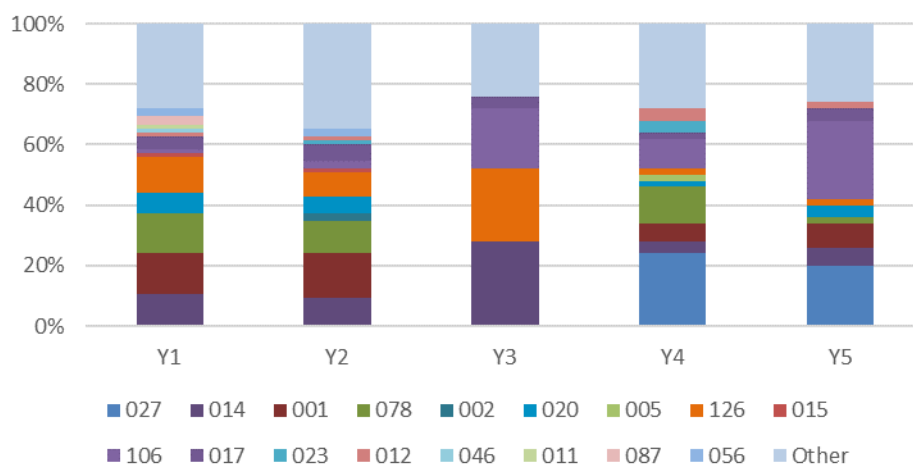

73

74

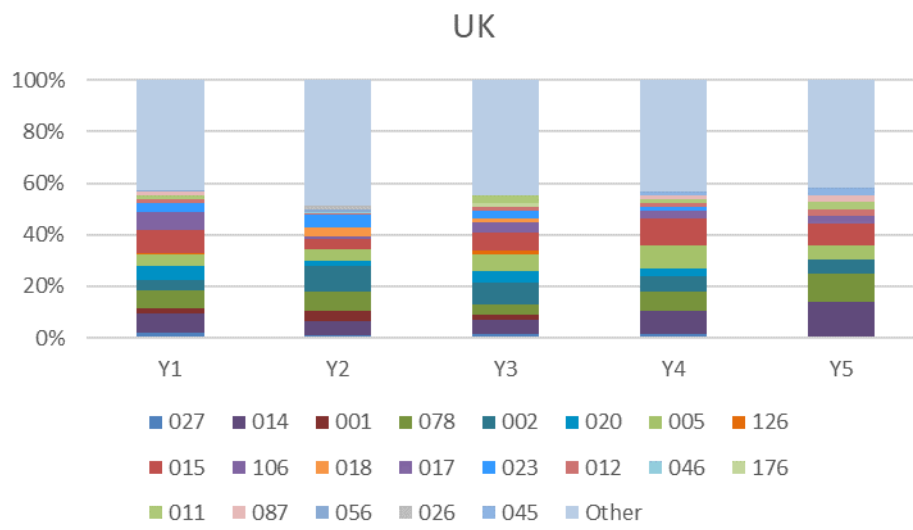

75

76

77 Other = all other ribotypes with prevalence <1%

78 Online Resource 3

79 Proportions of sensitive, intermediate and resistant *C. difficile* isolates from Years 1–5 of the *ClosER* study

|                                                | <b>M</b>           | <b>V</b>           | <b>FDX</b>         | <b>RIF</b>        | <b>MXF</b>        | <b>CLINDA</b>     | <b>IMI</b>        | <b>CHLOR</b>      | <b>TIG</b>         |
|------------------------------------------------|--------------------|--------------------|--------------------|-------------------|-------------------|-------------------|-------------------|-------------------|--------------------|
| <b>Sensitive isolates, % (n/N)</b>             |                    |                    |                    |                   |                   |                   |                   |                   |                    |
| Antimicrobial concentration, mg/L (breakpoint) | ≤2                 | ≤2                 | ≤1                 | ≤0.004            | ≤2                | ≤2                | ≤4                | ≤8                | ≤0.25              |
| Year 1                                         | 97.9<br>(923/943)  | 96.7(912/943)      | 100.0<br>(943/943) | 80.5<br>(759/943) | 58.7<br>(553/942) | 37.6<br>(354/942) | 62.7<br>(591/943) | 92.9<br>(876/943) | 100.0<br>(943/943) |
| Year 2                                         | 98.1<br>(935/948)  | 98.8<br>(942/948)  | 100.0<br>(948/948) | 82.1<br>(783/948) | 64.5<br>(616/948) | 29.1<br>(279/948) | 77.3<br>(739/948) | 93.1<br>(888/948) | 100.0<br>(948/948) |
| Year 3                                         | 96.9<br>(778/803)  | 99.8<br>(801/803)  | 100.0<br>(803/803) | 86.8<br>(705/802) | 66.0<br>(531/804) | 18.3<br>(147/803) | 78.1<br>(628/803) | 91.5<br>(735/803) | 100.0<br>(803/803) |
| Year 4                                         | 99.5<br>(557/560)  | 100.0<br>(560/560) | 100.0<br>(560/560) | 88.4<br>(494/559) | 70.5<br>(395/560) | 53.2<br>(305/560) | 66.4<br>(372/560) | 96.8<br>(541/559) | 99.3 (559/560)     |
| Year 5                                         | 100.0<br>(242/242) | 100.0<br>(245/245) | 99.6<br>(244/245)  | 85.3<br>(209/245) | 67.6<br>(164/244) | 54.5<br>(133/245) | 60.2<br>(148/245) | 97.6<br>(240/245) | 100.0<br>(245/245) |

|                                       | <b>M</b>            | <b>V</b>            | <b>FDX</b>           | <b>RIF</b>          | <b>MXF</b>          | <b>CLINDA</b>       | <b>IMI</b>          | <b>CHLOR</b>        | <b>TIG</b>           |
|---------------------------------------|---------------------|---------------------|----------------------|---------------------|---------------------|---------------------|---------------------|---------------------|----------------------|
| TOTAL                                 | 98.3<br>(3435/3496) | 90.3<br>(3160/3499) | 99.98<br>(3498/3499) | 84.4<br>(2950/3497) | 64.5<br>(2256/3498) | 34.8<br>(1218/3498) | 70.8<br>(2478/3499) | 68.7<br>(2404/3497) | 99.97<br>(3498/3499) |
| <b>Intermediate isolates, % (n/N)</b> |                     |                     |                      |                     |                     |                     |                     |                     |                      |
| Antimicrobial concentration, mg/L     | 4                   | 4                   |                      | 0.008-16            | 4                   | 4                   | 8                   | 16                  |                      |
| Year 1                                | 2.0 (19/943)        | 2.4 (23/943)        |                      | 6.0 (57/943)        | 1.8 (17/942)        | 12.4 (117/942)      | 30.1 (284/943)      | 3.5 (33/943)        |                      |
| Year 2                                | 1.3 (12/948)        | 0.6 (6/948)         |                      | 3.7 (30/948)        | 0.9 (9/948)         | 13.7 (129/948)      | 19.7 (187/948)      | 2.6 (25/948)        |                      |
| Year 3                                | 2.6 (21/803)        | 0.1 (1/803)         |                      | 1.5 (5/802)         | 0.5 (4/804)         | 17.4 (140/803)      | 19.7 (158/803)      | 5.1 (41/803)        |                      |
| Year 4                                | 0.4 (2/560)         |                     |                      | 1.4 (8/559)         | 0.5 (3/560)         | 10.357 (58/560)     | 31.4 (176/560)      | 0.9 (5/559)         |                      |
| Year 5                                |                     |                     |                      | 2.9 (7/245)         | 0.8 (2/244)         | 17.1 (42/245)       | 35.8 (88/245)       | 1.2 (1/246)         |                      |
| TOTAL                                 | 1.5<br>(54/3496)    | 0.86<br>(30/3499)   |                      | 3.1<br>(107/3497)   | 1.0<br>(35/3498)    | 13.9<br>(486/3498)  | 24.7<br>(893/3499)  | 3.0<br>(105/3497)   |                      |



|                                    | <b>M</b>            | <b>V</b>             | <b>FDX</b>                  | <b>RIF</b>             | <b>MXF</b>              | <b>CLINDA</b>           | <b>IMI</b>            | <b>CHLOR</b>          | <b>TIG</b>                     |
|------------------------------------|---------------------|----------------------|-----------------------------|------------------------|-------------------------|-------------------------|-----------------------|-----------------------|--------------------------------|
| <b>Resistant isolates, % (n/N)</b> |                     |                      |                             |                        |                         |                         |                       |                       |                                |
| Antimicrobial concentration, mg/L  | ≥8                  | ≥8                   | >1 (reduced susceptibility) | ≥16                    | ≥8                      | ≥8                      | ≥16                   | ≥32                   | >0.25 (reduced susceptibility) |
| Year 1                             | 0.1 (1/943)         | 0.8 (8/943)          |                             | 13.5 (127/943)         | 39.5 (372/942)          | 49.8 (471/942)          | 7.2 (68/943)          | 3.6 (34/943)          |                                |
| Year 2                             | 0.1 (1/948)         |                      |                             | 13.7 (130/948)         | 34.1 (323/948)          | 56.6 (540/948)          | 2.3 (34/943)          | 3.7 (35/948)          |                                |
| Year 3                             | 0.5 (4/803)         | 0.1 (1/803)          |                             | 11.6 (92/802)          | 33.5 (268/804)          | 64.3 (516/803)          | 2.2 (17/803)          | 3.4 (27/803)          |                                |
| Year 4                             | 0.2 (1/560)         |                      |                             | 10.2 (57/559)          | 28.9 (162/560)          | 35.18 (197/560)         | 2.1 (12/560)          | 2.3 (13/559)          | 0.2 (1/560)                    |
| Year 5                             |                     |                      | 0.4 (1/245)                 | 11.8 (29/245)          | 31.6 (77/244)           | 28.6 (70/245)           | 4.1 (88/245)          | 1.2 (3/246)           |                                |
| <b>TOTAL</b>                       | <b>0.2 (6/3496)</b> | <b>0.03 (9/3499)</b> | <b>0.02 (1/3499)</b>        | <b>12.4 (432/3497)</b> | <b>40.1 (1401/3498)</b> | <b>51.3 (1794/3498)</b> | <b>6.3 (219/3499)</b> | <b>3.2 (112/3497)</b> | <b>0.03 (1/3499)</b>           |

80 M, metronidazole; V, vancomycin; FDX, fidaxomicin; RIF, rifampicin; MXF, moxifloxacin; CLINDA, clindamycin; IMI, imipenem; CHLOR, chloramphenicol;  
81 TIG, tigecycline

## 82 Online Resource 4

83 MICs (mg/L) of prevalent *C. difficile* PCR ribotypes over Years 1–5 of the ClosER study

| Year | Ribotype | M    | V    | FDX  | RIF    | MXF   | CLINDA | IMI  | CHLOR | TIG  |
|------|----------|------|------|------|--------|-------|--------|------|-------|------|
| 1    | 027      | 1.41 | 0.70 | 0.04 | 0.472  | 22.16 | 3.55   | 7.13 | 4.91  | 0.04 |
| 2    | 027      | 1.47 | 0.81 | 0.07 | 0.303  | 22.71 | 4.82   | 6.94 | 5.15  | 0.04 |
| 3    | 027      | 1.24 | 0.71 | 0.08 | 0.351  | 18.35 | 6.34   | 6.69 | 5.72  | 0.03 |
| 4    | 027      | 0.89 | 0.66 | 0.03 | 0.512  | 25.49 | 2.18   | 7.10 | 4.81  | 0.03 |
| 5    | 027      | 1.00 | 0.53 | 0.02 | 14.136 | 4.00  | 1.46   | 6.62 | 7.51  | 0.04 |
| 1    | 001      | 0.47 | 0.83 | 0.01 | 0.007  | 12.18 | 48.63  | 5.18 | 8.74  | 0.04 |
| 2    | 001      | 0.33 | 0.64 | 0.01 | 0.006  | 14.06 | 41.84  | 3.48 | 6.84  | 0.04 |
| 3    | 001      | 0.38 | 0.66 | 0.02 | 0.006  | 13.45 | 54.40  | 5.08 | 7.91  | 0.03 |
| 4    | 001      | 0.50 | 0.72 | 0.01 | 0.003  | 28.13 | 62.98  | 6.08 | 7.38  | 0.05 |
| 5    | 001      | 0.31 | 0.62 | 0.01 | 0.039  | 2.11  | 16.00  | 3.79 | 6.82  | 0.04 |
| 1    | 078      | 0.27 | 0.63 | 0.04 | 0.003  | 3.39  | 2.85   | 3.18 | 5.07  | 0.05 |
| 2    | 078      | 0.21 | 0.69 | 0.05 | 0.003  | 2.63  | 4.93   | 3.04 | 4.21  | 0.04 |
| 3    | 078      | 0.19 | 0.62 | 0.05 | 0.003  | 2.51  | 6.92   | 3.09 | 4.93  | 0.04 |
| 4    | 078      | 0.15 | 0.77 | 0.02 | 0.002  | 2.75  | 2.71   | 3.53 | 5.61  | 0.04 |

| <b>Year</b> | <b>Ribotype</b> | <b>M</b> | <b>V</b> | <b>FDX</b> | <b>RIF</b> | <b>MXF</b> | <b>CLINDA</b> | <b>IMI</b> | <b>CHLOR</b> | <b>TIG</b> |
|-------------|-----------------|----------|----------|------------|------------|------------|---------------|------------|--------------|------------|
| 5           | 078             | 0.17     | 0.72     | 0.02       | 0.002      | 3.10       | 2.15          | 4.63       | 4.63         | 0.04       |
| 1           | 014             | 0.27     | 0.65     | 0.06       | 0.002      | 2.41       | 5.15          | 4.31       | 5.87         | 0.05       |
| 2           | 014             | 0.25     | 0.60     | 0.06       | 0.003      | 1.95       | 4.83          | 3.16       | 4.90         | 0.04       |
| 3           | 014             | 0.22     | 0.63     | 0.06       | 0.003      | 2.00       | 8.20          | 3.77       | 5.97         | 0.04       |
| 4           | 014             | 0.18     | 0.59     | 0.04       | 0.002      | 2.07       | 3.27          | 4.07       | 5.33         | 0.04       |
| 5           | 014             | 0.17     | 0.52     | 0.02       | 0.002      | 1.91       | 2.39          | 4.51       | 4.51         | 0.03       |
| 1           | 020             | 0.31     | 0.73     | 0.07       | 0.002      | 2.63       | 6.43          | 4.80       | 5.66         | 0.05       |
| 2           | 020             | 0.27     | 0.64     | 0.06       | 0.002      | 2.07       | 4.06          | 2.96       | 5.09         | 0.05       |
| 3           | 020             | 0.22     | 0.65     | 0.06       | 0.002      | 1.68       | 6.94          | 3.42       | 5.75         | 0.04       |
| 4           | 020             | 0.23     | 0.56     | 0.03       | 0.002      | 2.18       | 5.19          | 4.62       | 5.82         | 0.04       |
| 5           | 020             | 0.18     | 0.50     | 0.03       | 0.002      | 3.23       | 4.69          | 4.45       | 5.22         | 0.04       |
| 1           | 126             | 0.23     | 0.66     | 0.04       | 0.003      | 9.37       | 15.69         | 3.62       | 5.38         | 0.06       |
| 2           | 126             | 0.23     | 0.60     | 0.05       | 0.003      | 5.79       | 25.40         | 3.10       | 4.59         | 0.05       |
| 3           | 126             | 0.17     | 0.62     | 0.04       | 0.003      | 4.58       | 15.47         | 3.05       | 5.52         | 0.04       |
| 4           | 126             | 0.15     | 0.74     | 0.02       | 0.002      | 5.38       | 2.21          | 2.69       | 5.38         | 0.04       |
| 5           | 126             | 0.20     | 1.00     | 0.02       | 0.003      | 3.56       | 7.13          | 4.00       | 4.49         | 0.06       |
| 1           | 002             | 0.24     | 0.65     | 0.05       | 0.002      | 2.13       | 6.80          | 4.00       | 5.89         | 0.04       |

| <b>Year</b> | <b>Ribotype</b> | <b>M</b> | <b>V</b> | <b>FDX</b> | <b>RIF</b> | <b>MXF</b> | <b>CLINDA</b> | <b>IMI</b> | <b>CHLOR</b> | <b>TIG</b> |
|-------------|-----------------|----------|----------|------------|------------|------------|---------------|------------|--------------|------------|
| 2           | 002             | 0.25     | 0.74     | 0.06       | 0.003      | 1.86       | 5.40          | 3.04       | 4.74         | 0.03       |
| 3           | 002             | 0.19     | 0.74     | 0.07       | 0.002      | 2.25       | 7.54          | 3.55       | 5.17         | 0.03       |
| 4           | 002             | 0.17     | 0.79     | 0.04       | 0.004      | 1.76       | 3.91          | 3.67       | 4.97         | 0.03       |
| 5           | 002             | 0.17     | 0.76     | 0.02       | 0.002      | 1.59       | 2.00          | 4.49       | 4.32         | 0.03       |
| 1           | 015             | 0.20     | 0.62     | 0.04       | 0.001      | 1.58       | 3.15          | 5.30       | 5.30         | 0.05       |
| 2           | 015             | 0.23     | 0.70     | 0.04       | 0.003      | 1.54       | 1.65          | 3.23       | 4.00         | 0.04       |
| 3           | 015             | 0.19     | 0.60     | 0.04       | 0.002      | 1.21       | 3.31          | 4.13       | 5.15         | 0.03       |
| 4           | 015             | 0.14     | 0.72     | 0.04       | 0.002      | 1.70       | 1.64          | 4.72       | 5.38         | 0.04       |
| 5           | 015             | 0.20     | 0.56     | 0.02       | 0.002      | 1.78       | 1.26          | 5.66       | 4.00         | 0.03       |
| 1           | 005             | 0.26     | 0.82     | 0.05       | 0.003      | 2.50       | 4.28          | 5.12       | 5.00         | 0.05       |
| 2           | 005             | 0.23     | 0.83     | 0.05       | 0.002      | 1.62       | 4.70          | 3.10       | 4.19         | 0.05       |
| 3           | 005             | 0.22     | 0.87     | 0.06       | 0.003      | 1.60       | 5.59          | 3.42       | 5.47         | 0.04       |
| 4           | 005             | 0.16     | 0.73     | 0.03       | 0.002      | 1.21       | 1.88          | 3.21       | 4.83         | 0.04       |
| 5           | 005             | 0.14     | 0.50     | 0.01       | 0.002      | 2.83       | 1.00          | 4.00       | 3.56         | 0.03       |
| 1           | 106             | 0.65     | 0.82     | 0.07       | 0.002      | 8.48       | 6.17          | 6.54       | 6.92         | 0.04       |
| 2           | 106             | 0.40     | 0.90     | 0.04       | 0.004      | 5.22       | 14.38         | 4.95       | 7.58         | 0.05       |
| 3           | 106             | 0.37     | 0.71     | 0.08       | 0.003      | 5.44       | 8.00          | 4.67       | 4.67         | 0.04       |

| Year | Ribotype | M            | V    | FDX  | RIF    | MXF   | CLINDA | IMI  | CHLOR | TIG  |
|------|----------|--------------|------|------|--------|-------|--------|------|-------|------|
| 4    | 106      | 0.16         | 0.63 | 0.02 | 0.005  | 8.00  | 1.85   | 4.67 | 4.76  | 0.03 |
| 5    | 106      | 0.26         | 0.55 | 0.04 | 0.002  | 4.27  | 4.88   | 5.56 | 5.94  | 0.04 |
| 1    | 023      | 0.19         | 0.72 | 0.06 | 0.003  | 1.83  | 0.83   | 3.65 | 6.48  | 0.05 |
| 2    | 023      | 0.25         | 0.75 | 0.07 | 0.002  | 1.39  | 1.34   | 3.59 | 4.46  | 0.04 |
| 3    | 023      | 0.22         | 0.76 | 0.07 | 0.002  | 1.74  | 1.00   | 3.25 | 5.66  | 0.04 |
| 4    | 023*     | 0.18         | 0.35 | 0.02 | 0.002  | 1.41  | 0.59   | 2.38 | 4.00  | 0.03 |
| 5    | 023      | 0.15         | 0.50 | 0.05 | 0.003  | 1.68  | 0.59   | 4.76 | 4.00  | 0.04 |
| 1    | 018      | 0.41         | 2.00 | 0.04 | 2.072  | 35.33 | 4.42   | 5.56 | 5.04  | 0.04 |
| 2    | 018      | 0.31         | 0.69 | 0.05 | 1.111  | 11.89 | 7.43   | 5.80 | 4.76  | 0.04 |
| 3    | 018      | 0.20         | 0.67 | 0.03 | 1.425  | 11.31 | 8.00   | 5.34 | 5.04  | 0.04 |
| 4    | 018      | 0.19         | 1.00 | 0.03 | 0.002  | 0.92  | 2.38   | 3.67 | 4.36  | 0.04 |
| 5    | 018      | not isolated |      |      |        |       |        |      |       |      |
| 1    | 356      | 0.61         | 2.28 | 0.04 | 18.871 | 50.80 | 8.55   | 5.86 | 4.88  | 0.04 |
| 2    | 356      | 0.57         | 0.57 | 0.05 | 32.000 | 32.00 | 13.93  | 6.06 | 4.59  | 0.05 |
| 3    | 356      | 0.13         | 1.00 | 0.03 | 32.000 | 16.00 | 32.00  | 4.00 | 4.00  | 0.03 |
| 4    | 356      | not isolated |      |      |        |       |        |      |       |      |
| 5    | 356      | not isolated |      |      |        |       |        |      |       |      |

| Year | Ribotype | M            | V    | FDX  | RIF   | MXF   | CLINDA | IMI   | CHLOR | TIG  |
|------|----------|--------------|------|------|-------|-------|--------|-------|-------|------|
| 1    | 012      | 0.27         | 0.72 | 0.05 | 0.005 | 2.40  | 51.42  | 5.36  | 9.60  | 0.08 |
| 2    | 012      | 0.39         | 0.91 | 0.05 | 0.002 | 1.81  | 55.17  | 3.81  | 6.56  | 0.08 |
| 3    | 012      | 0.29         | 0.79 | 0.06 | 0.002 | 2.52  | 69.12  | 4.00  | 11.76 | 0.06 |
| 4    | 012      | 0.21         | 0.74 | 0.03 | 0.007 | 2.83  | 43.07  | 4.64  | 9.28  | 0.04 |
| 5    | 012      | 0.20         | 0.50 | 0.04 | 0.050 | 1.59  | 6.35   | 1.59  | 3.17  | 0.06 |
| 1    | 017      | 0.27         | 0.65 | 0.02 | 0.925 | 18.22 | 43.34  | 5.91  | 7.66  | 0.04 |
| 2    | 017      | 0.22         | 0.61 | 0.02 | 1.187 | 13.59 | 39.24  | 9.81  | 14.75 | 0.05 |
| 3    | 017      | 0.22         | 0.72 | 0.05 | 0.420 | 9.19  | 50.80  | 10.56 | 14.59 | 0.05 |
| 4    | 017      | 0.13         | 0.74 | 0.02 | 0.505 | 9.75  | 11.89  | 4.42  | 6.56  | 0.05 |
| 5    | 017      | 0.20         | 0.50 | 0.01 | 0.201 | 7.13  | 57.02  | 8.98  | 8.98  | 0.04 |
| 1    | 198      | 1.19         | 0.39 | 0.04 | 0.006 | 5.66  | 0.77   | 7.34  | 4.00  | 0.03 |
| 2    | 198      | 1.64         | 0.55 | 0.08 | 0.015 | 23.78 | 12.49  | 7.61  | 4.88  | 0.03 |
| 3    | 198      | 1.68         | 0.50 | 0.10 | 0.004 | 24.68 | 4.00   | 8.00  | 8.00  | 0.04 |
| 4    | 198      | 2.52         | 0.79 | 0.07 | 0.225 | 28.51 | 3.56   | 7.13  | 5.66  | 0.04 |
| 5    | 198      | not isolated |      |      |       |       |        |       |       |      |
| 1    | 176      | 2.18         | 0.65 | 0.02 | 1.009 | 26.91 | 2.00   | 5.66  | 3.08  | 0.04 |
| 2    | 176      | 0.77         | 0.65 | 0.05 | 0.848 | 17.45 | 1.41   | 7.34  | 3.67  | 0.03 |

| <b>Year</b> | <b>Ribotype</b> | <b>M</b> | <b>V</b> | <b>FDX</b> | <b>RIF</b> | <b>MXF</b> | <b>CLINDA</b> | <b>IMI</b> | <b>CHLOR</b> | <b>TIG</b> |
|-------------|-----------------|----------|----------|------------|------------|------------|---------------|------------|--------------|------------|
| 3           | 176             | 2.11     | 1.00     | 0.08       | 0.601      | 30.34      | 4.69          | 9.90       | 4.22         | 0.04       |
| 4           | 176             | 1.00     | 0.50     | 0.04       | 32.000     | 16.00      | 0.68          | 8.00       | 4.00         | 0.03       |
| 5           | 176             | 1.41     | 0.59     | 0.03       | 32.000     | 16.00      | 0.25          | 10.37      | 4.00         | 0.03       |
| 1           | all isolates    | 0.37     | 0.76     | 0.04       | 0.008      | 4.79       | 5.72          | 4.75       | 5.82         | 0.05       |
| 2           | all isolates    | 0.33     | 0.70     | 0.05       | 0.009      | 3.90       | 7.61          | 3.88       | 5.39         | 0.04       |
| 3           | all isolates    | 0.29     | 0.70     | 0.05       | 0.007      | 3.73       | 9.18          | 4.17       | 6.06         | 0.04       |
| 4           | all isolates    | 0.24     | 0.67     | 0.03       | 0.006      | 3.35       | 4.11          | 4.37       | 5.61         | 0.04       |
| 5           | all isolates    | 0.21     | 0.59     | 0.02       | 0.006      | 2.57       | 2.62          | 4.74       | 4.97         | 0.04       |
| 1–5         | all isolates    | 0.46     | 0.70     | 0.04       | 0.007      | 3.88       | 6.21          | 4.32       | 5.67         | 0.04       |

84 M, metronidazole; V, vancomycin; FDX, fidaxomicin; MIC, minimum inhibitory concentration; RIF, rifampicin; MXF, moxifloxacin; CLINDA, clindamycin; IMI,  
85 imipenem; CHLOR, chloramphenicol; TIG, tigecycline. MICs are reported as geometric means

86 Online Resource 5

87 Fidaxomicin MIC (mg/L) distributions for the most prevalent (n>30 isolates) ribotypes across  
88 all years of the study

89

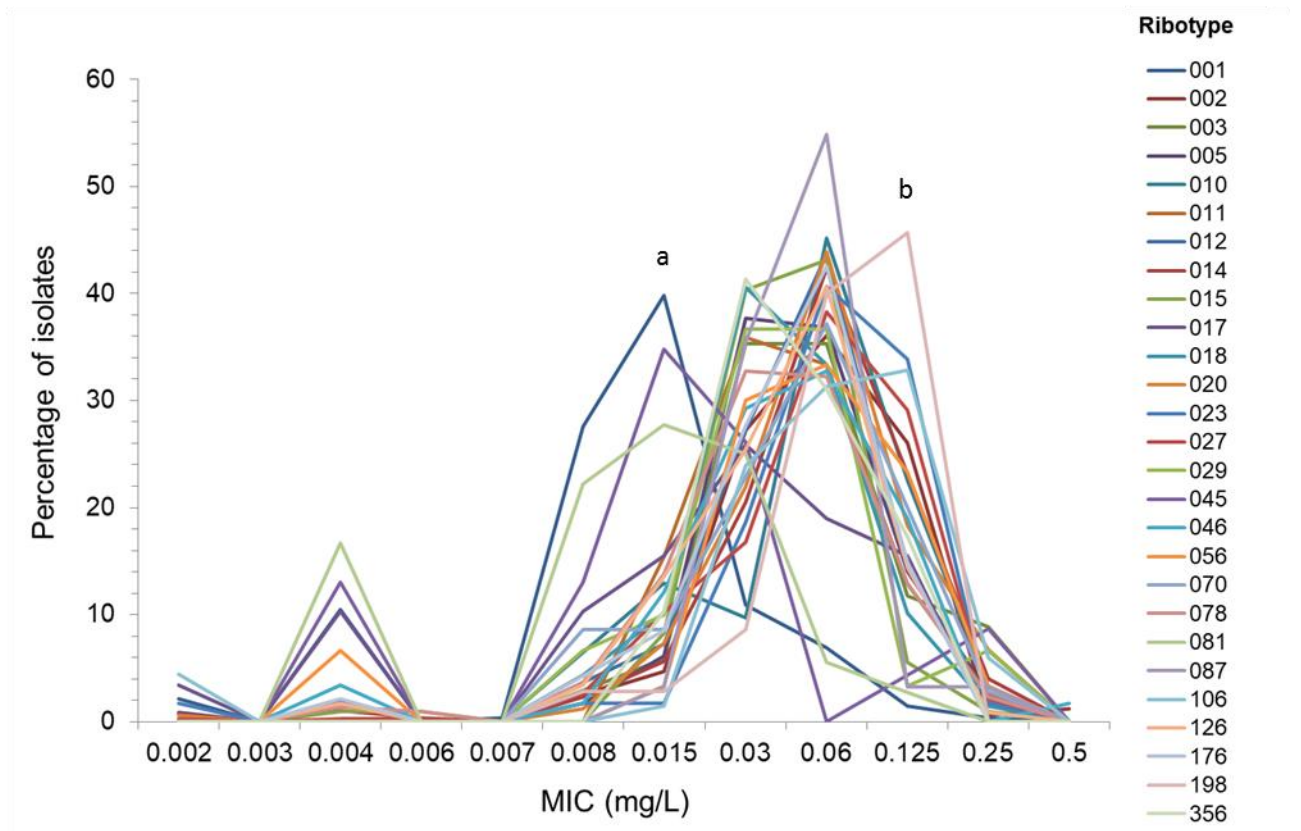

90

91 MIC, minimal inhibitory concentration; RT, ribotype. <sup>a</sup>RT001 geometric mean MICs were significantly  
92 lower than the geometric mean fidaxomicin MIC for all ribotypes. <sup>b</sup>RT198 geometric mean MICs were  
93 significantly higher than the geometric mean fidaxomicin MICs for all ribotypes

94



95 Online Resource 6

96 MICs of the nine antimicrobials tested for all RT344 isolates

| ID           | M     | V    | FDX   | RIF   | MXF | CLINDA | IMI | CHLOR | TIG  | Country  |
|--------------|-------|------|-------|-------|-----|--------|-----|-------|------|----------|
| L,16.7569611 | 0.125 | 0.25 | 0.004 | 0.001 | 1   | 0.5    | 2   | 4     | 0.03 | France   |
| L,16.7570015 | 0.125 | 0.5  | 0.015 | 0.002 | 2   | 0.125  | 2   | 4     | 0.03 | Slovenia |
| L,16.7570242 | 0.125 | 1    | 0.03  | 0.001 | 8   | 0.5    | 4   | 4     | 0.03 | France   |
| L,15.7104276 | 0.125 | 0.5  | 0.06  | 0.002 | 2   | 16     | 4   | 8     | 0.06 | Greece   |
| L,16.7569682 | 0.25  | 1    | 0.5   | 0.001 | 2   | 8      | 4   | 8     | 0.06 | Belgium  |
| L,16.7570132 | 0.125 | 1    | >4    | 0.002 | 16  | 16     | 16  | 4     | 0.03 | France   |

97 M, metronidazole; V, vancomycin; FDX, fidaxomicin; MIC, minimum inhibitory concentration; RIF,  
 98 rifampicin; MXF, moxifloxacin; CLINDA, clindamycin; IMI, imipenem; CHLOR, chloramphenicol; TIG,  
 99 tigecycline. MICs are reported as geometric means

100

101 Online Resource 7

102 Distribution of mean cumulative antimicrobial resistance scores for *Clostridium difficile*  
103 isolates across Europe in a) Year 1, b) Year 2, c) Year 3, d) Year 4 and e) Year 5 of the  
104 ClosER study

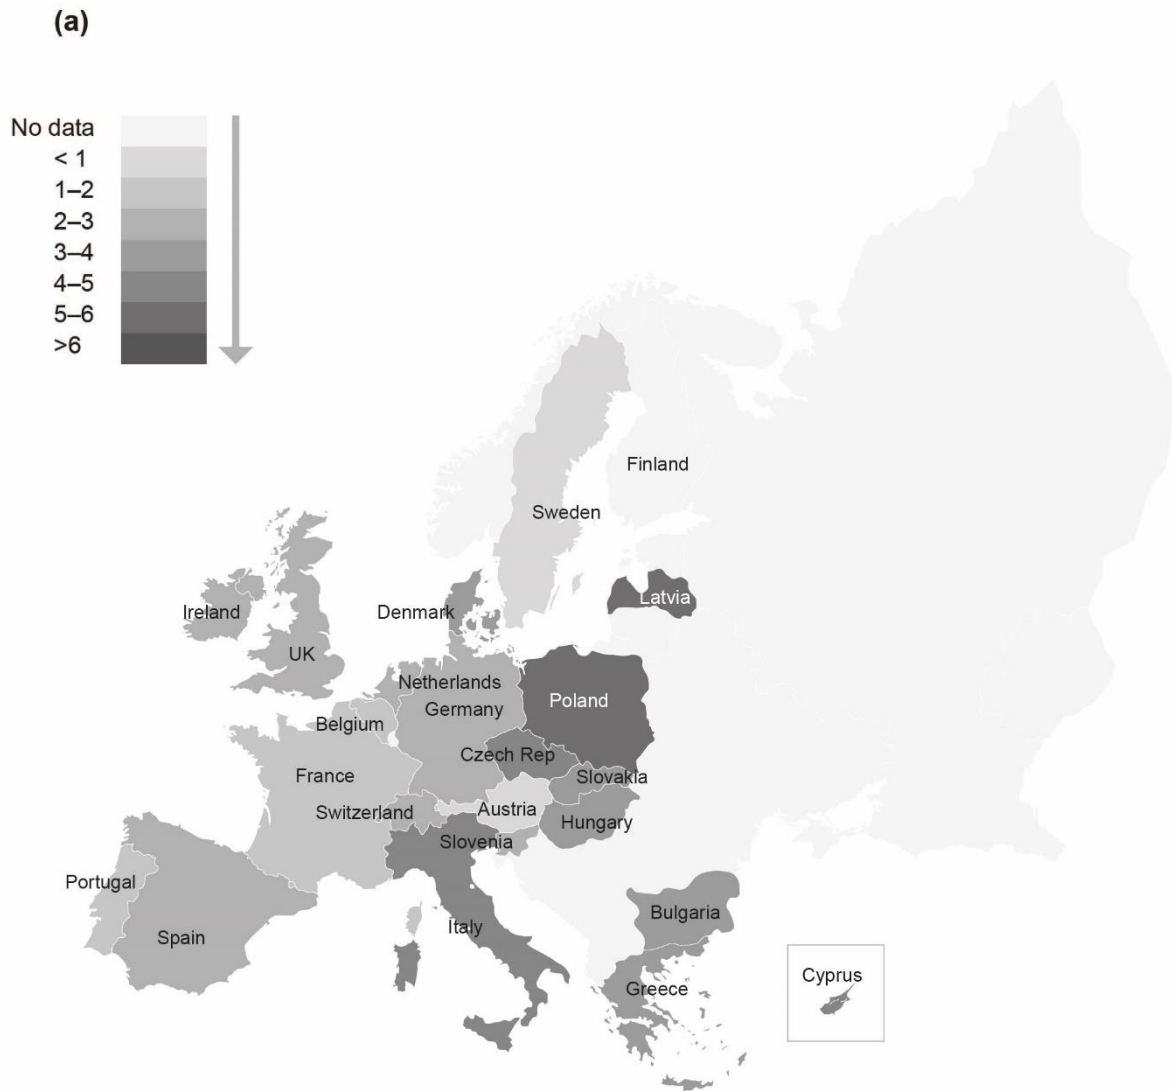

105

106

107

(b)

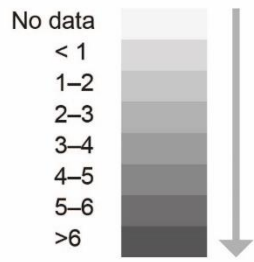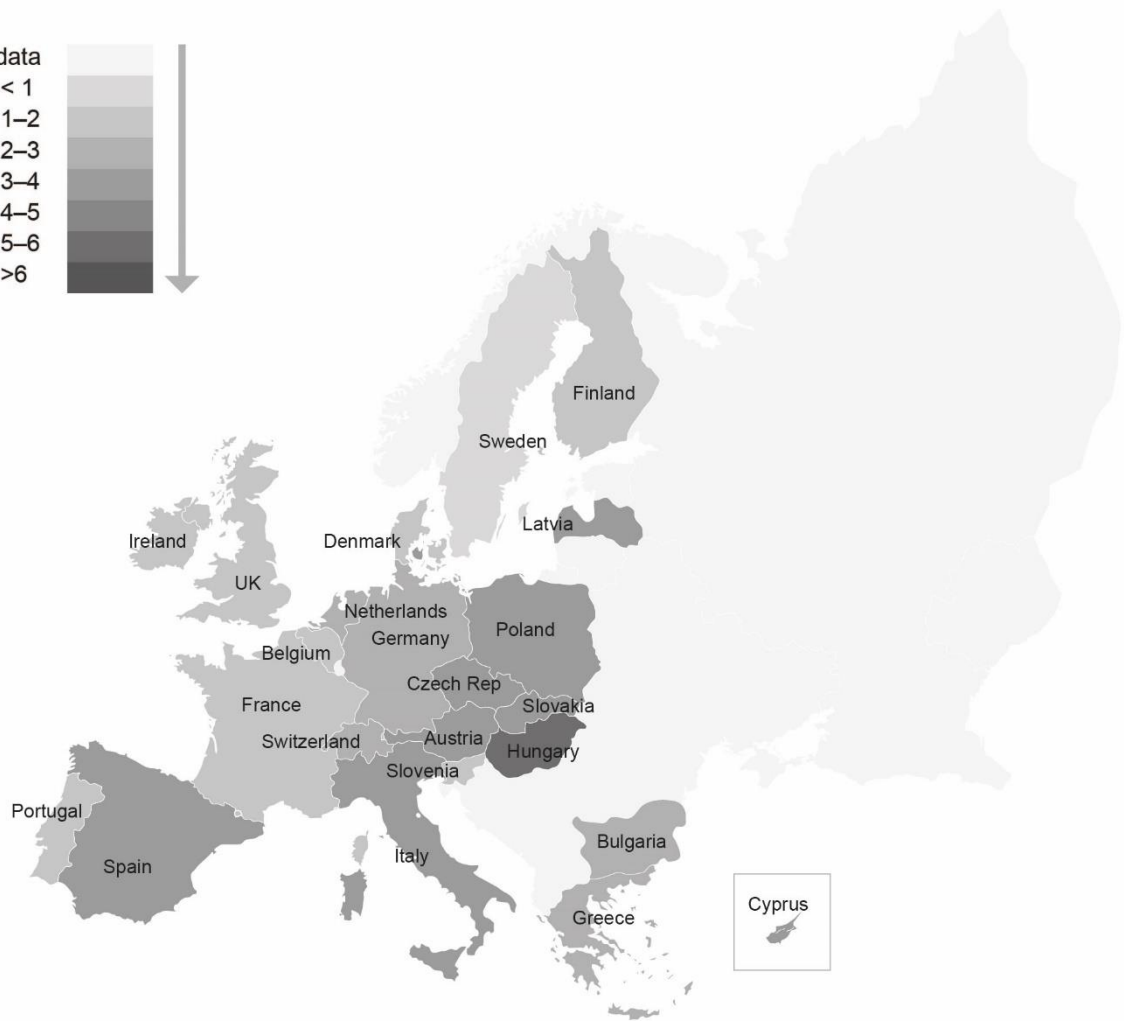

108

(c)

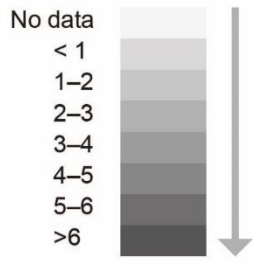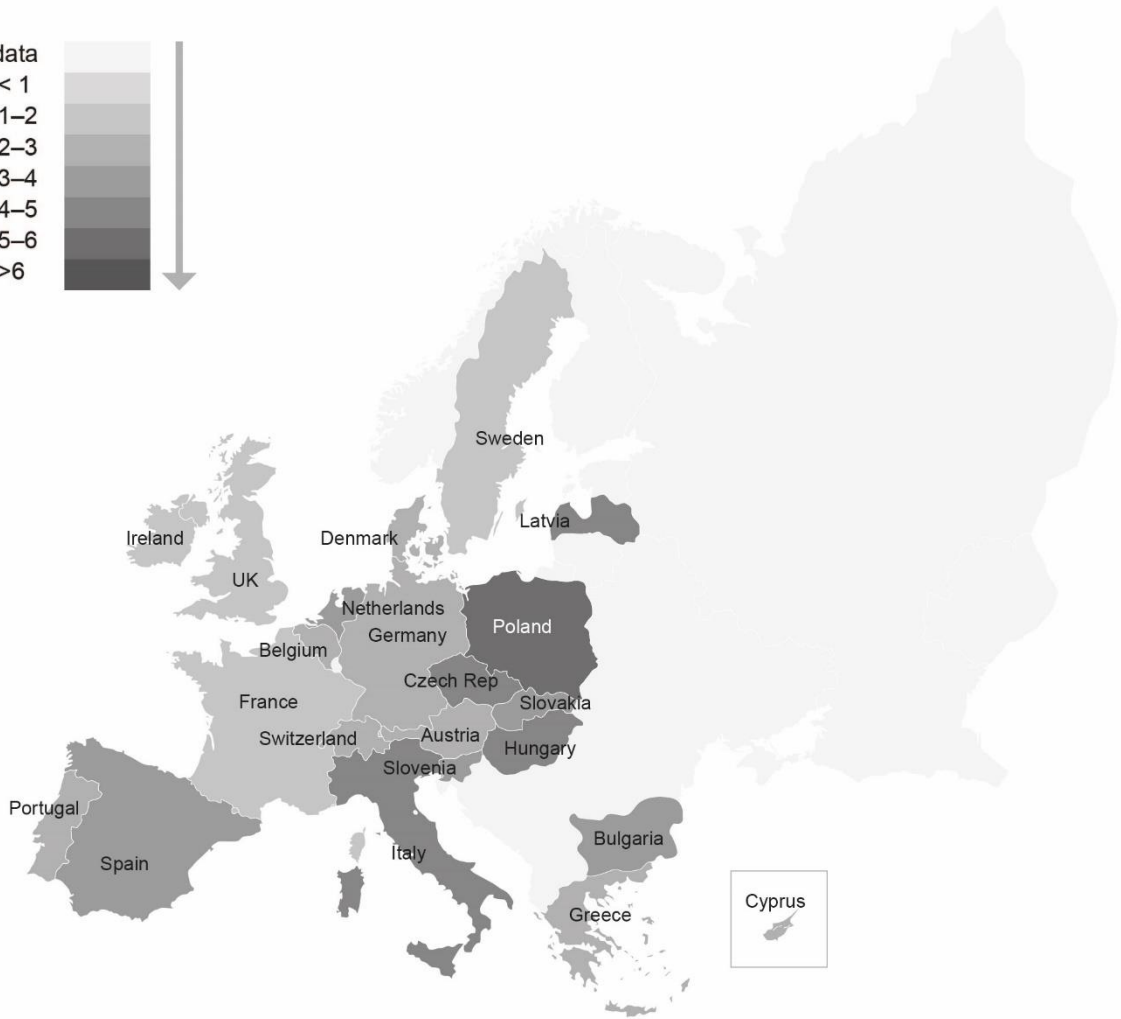

(d)

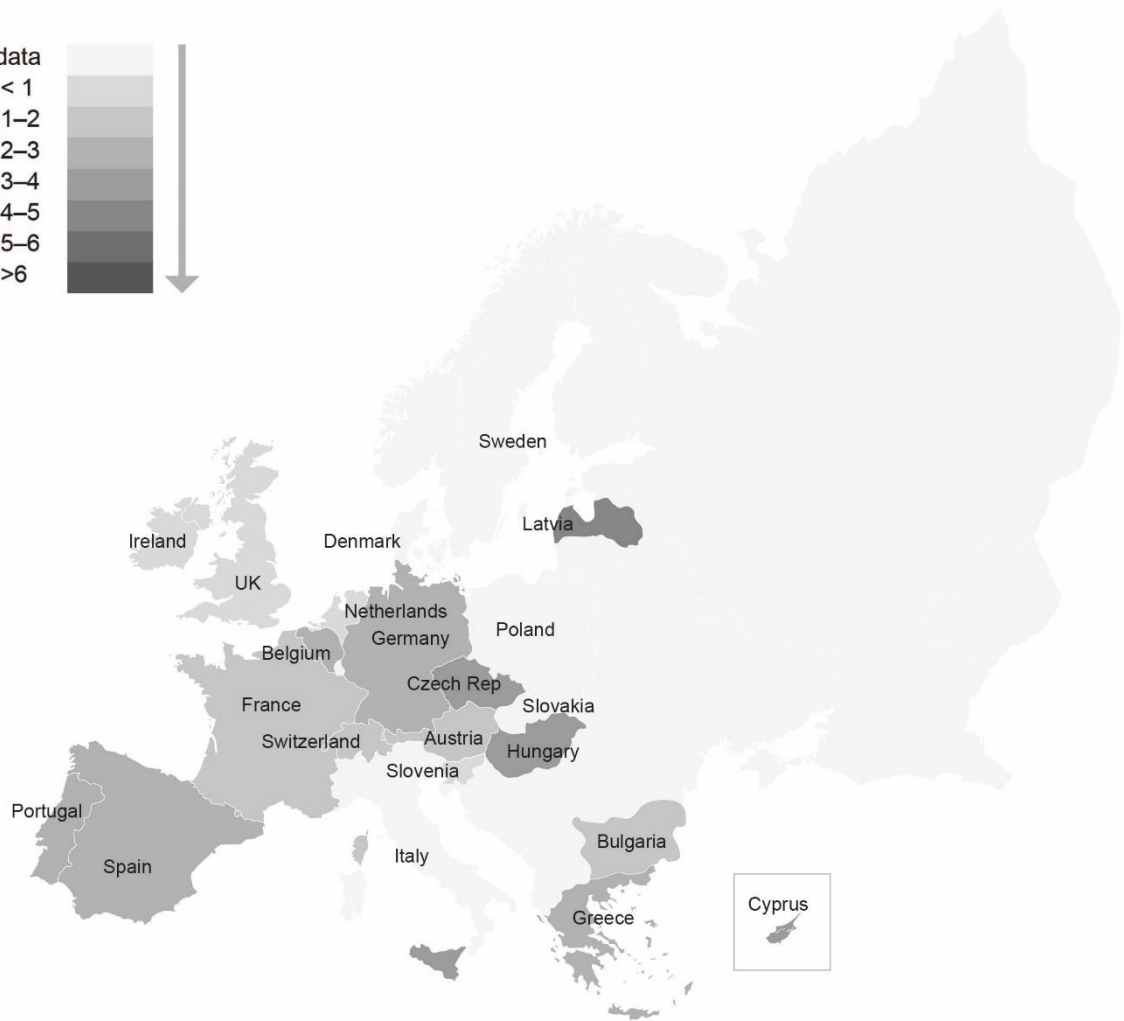

111

(e)

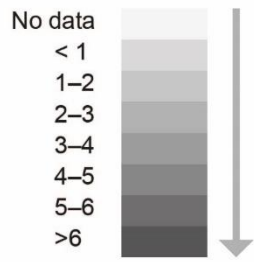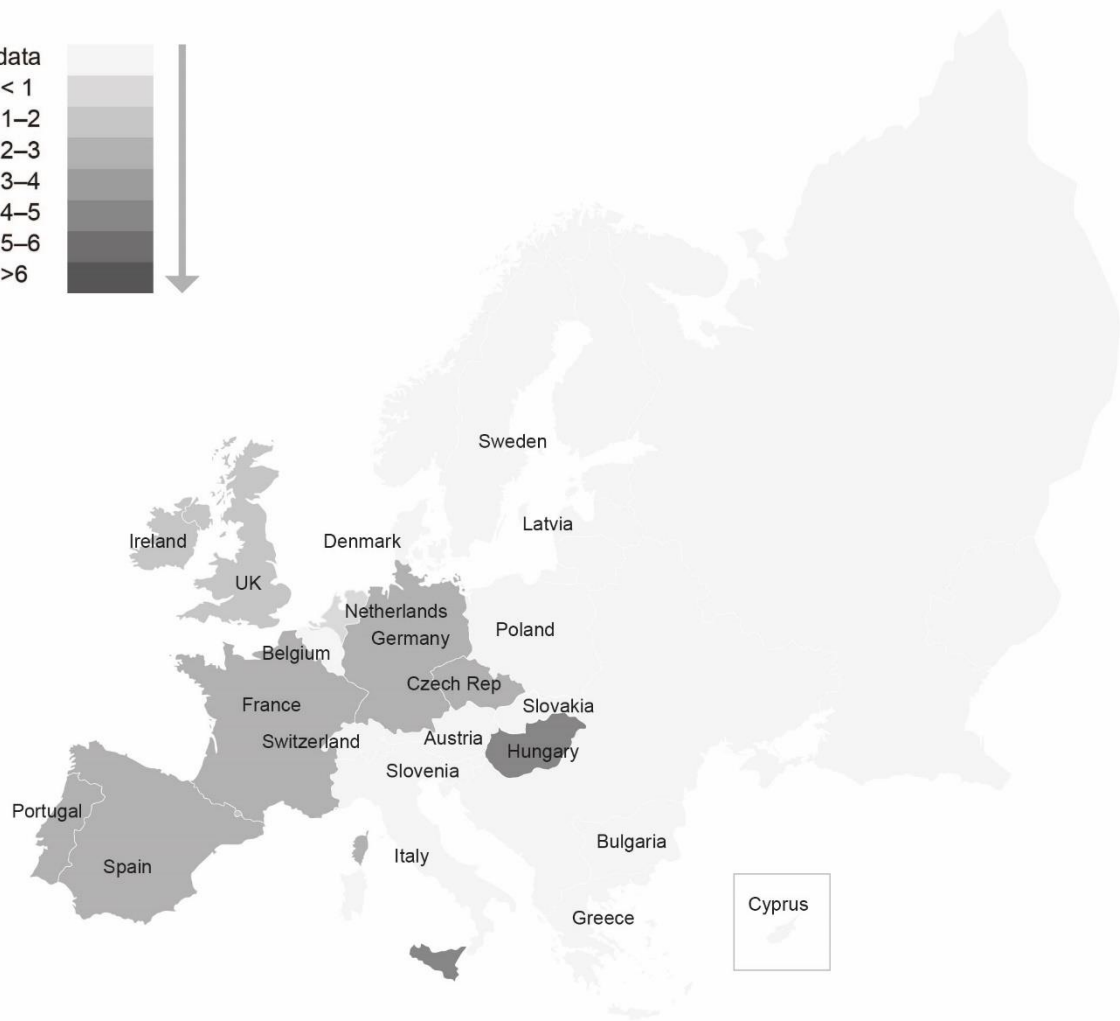

112

113

## Online Resource 8

Cumulative resistance score versus ribotype diversity score for each country, Years 1–5 of the *ClosER* study

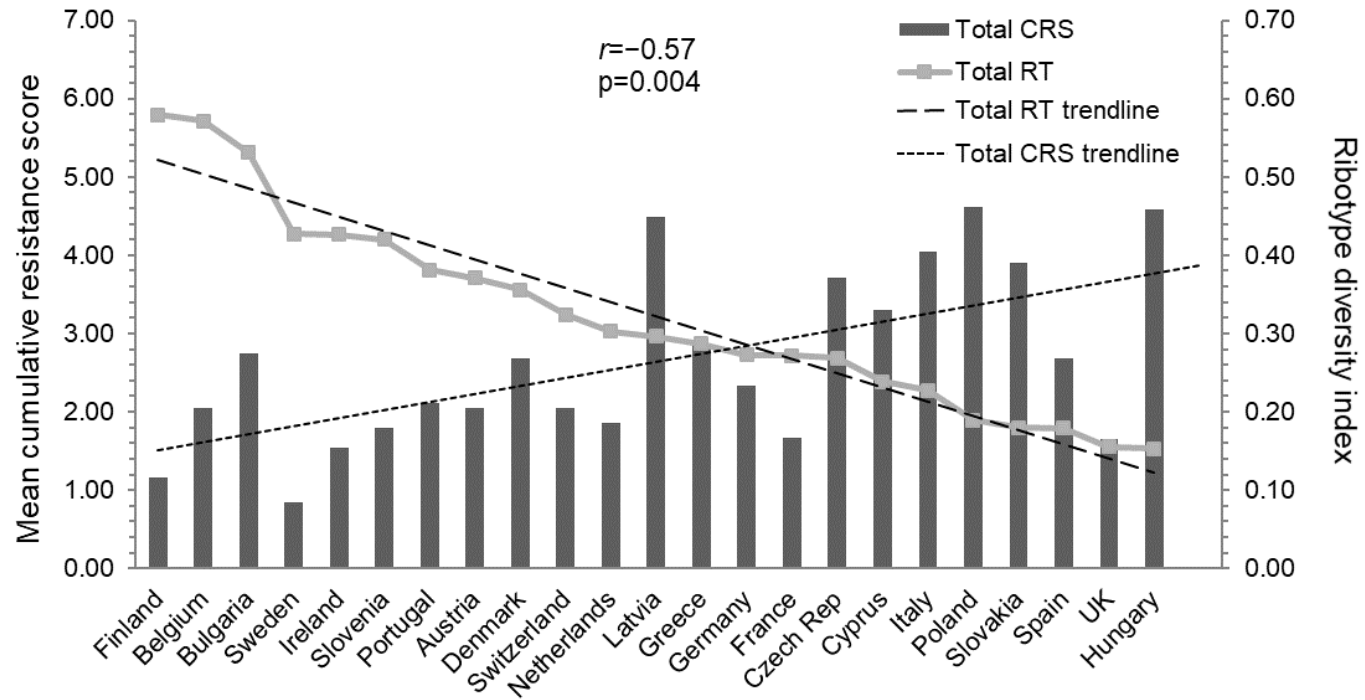

Supplement: MOESM1 [file 17480766]
